# Supplementary material for: A Screen for Suppressors of Gross Chromosomal Rearrangements Identifies a Conserved Role for PLP in Preventing DNA Lesions
Source: PLOS journal article supplement (doi:10.1371/journal.pgen.0030134), 2007-08-07
Supplement: S2 (10.1371/journal.pgen.0030134.s002) [file journal.pgen.0030134.s002]

Table S2 :Mean and Median cell size of *bud16* and*tpn1*mutants

| **Strain** | **Mean Cell Size (fL) ± S.D.** | **Median Cell Size (fL)** |
| --- | --- | --- |
| *wildtype* | 45.9 ± 1.7 | 47.5 |
| *bud16* | 39.2 ± 1.7 | 41.7 |
| *tpn1* | 38.9 ± 1.9 | 40.7 |
| *bud16**tpn1* | 39.2 ± 1.8 | 41.0 |
