# Supplementary figures and images for: A Screen for Suppressors of Gross Chromosomal Rearrangements Identifies a Conserved Role for PLP in Preventing DNA Lesions
Source: PLOS journal article supplement (doi:10.1371/journal.pgen.0030134), 2007-08-07

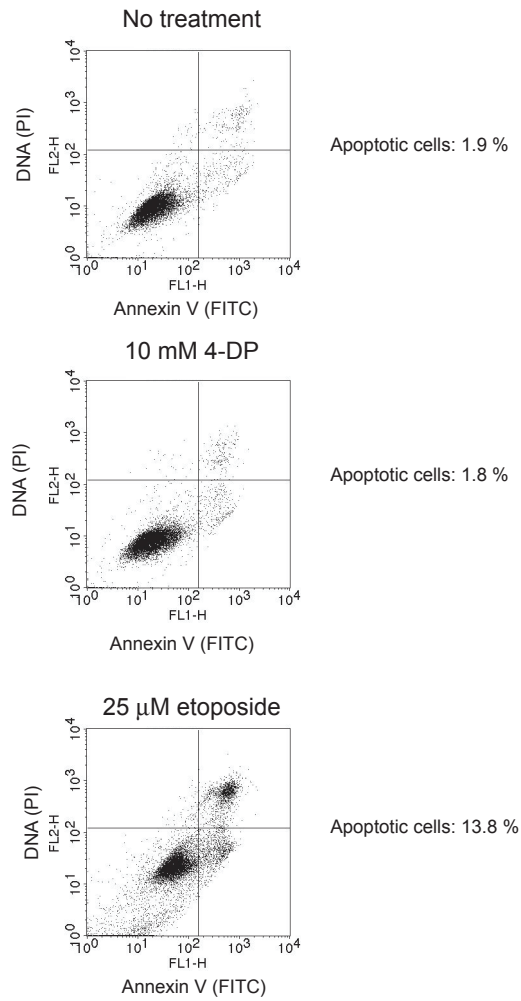

Figure S3: Kanellis *et al.*

Supplement: S3 (10.1371/journal.pgen.0030134.s003) [file journal.pgen.0030134.s003]
